# Supplementary material for: Graphene Fluoride: A Stable Stoichiometric Graphene Derivative and its Chemical Conversion to Graphene
Source: PubMed Central journal article supplement (PMC3020323; doi:10.1002/smll.201001401), 2010-11-22
Supplement: smll0006-2885-SD1.pdf [file smll0006-2885-SD1.pdf]

Copyright WILEY-VCH Verlag GmbH & Co. KGaA, 69469 Weinheim, Germany,  
2010.

NANO MICRO  
**small**

## Supporting Information

for *Small*, DOI: 10.1002/smll. 201001401

Graphene Fluoride: A Stable Stoichiometric Graphene  
Derivative and its Chemical Conversion to Graphene

Radek Zboržil, František Karlický, Athanasios B. Bourlinos,\*  
Theodore A. Steriotis, Athanasios K. Stubos, Vasilios Georgakilas,  
Klára Šafářová, Dalibor Jancík, Christos Trapalis, and Michal  
Otyepka\*

DOI: 10.1002/sml.201001401

Supplementary Information to  
Graphene fluoride: a stable stoichiometric graphene derivative and its chemical  
conversion to graphene

by

R. Zbořil, F. Karlický, A. B. Bourlinos, T. A. Steriotis, A. K. Stubos, V. Georgakilas, K.

Šafářová, D. Jančík, C. Trapalis, M. Otyepka

**Supplementary Table S1** Plane-wave basis set calculations on chair conformation of graphene (CH) available from literature. Distances are given in Å, band gaps in eV. Abbreviations used: PP – pseudopotential, PAW – projector augmented waves, TV – length of translation vector. For references see the main text.

|                | Sofo et al. | Lebegue et al. | Liu and Shen | Lu and Feng <sup>[a]</sup> | Flores et al. |
|----------------|-------------|----------------|--------------|----------------------------|---------------|
| code           | CASTEP      | VASP           | ABINIT       | DMOL3                      | DMOL          |
| method         | DFT (GGA)   | GWA            | DFT (LDA)    | DFT (GGA)                  | DFT (GGA)     |
| core-electrons | PP          | PAW            | PAW          | all-electron               | all-electron  |
| <i>d</i> (C-C) | 1.52        | 1.53           | ---          | 1.54                       | 1.537         |
| <i>d</i> (C-H) | 1.11        | 1.11           | ---          | 1.11                       | ---           |
| TV             | 2.516       | ---            | ---          | 2.463                      | 2.540         |
| band gap       | 3.5         | 5.4            | 3.6          | ~ 4.4                      | ---           |

[a]Calculation on graphene nanoribbons.

**Supplementary Table S2** Plane-wave basis set calculations on chair conformation of graphene fluoride (CF) available from literature. For details see caption of Supplementary Table S1. For references see the main text.

|                | Charlier et al. <sup>[a]</sup> | Tagaki and Kusakabe <sup>[a]</sup> | Han et al. <sup>[a]</sup> | Zhou et al. |
|----------------|--------------------------------|------------------------------------|---------------------------|-------------|
| code           | CORNING                        | FHI                                | SEQQUEST                  | VASP        |
| method         | DFT (LDA)                      | DFT (LDA)                          | DFT (GGA)                 | DFT (LDA)   |
| core-electrons | PP                             | PP                                 | PP                        | PAW         |
| <i>d</i> (C-C) | 1.552                          | ---                                | ---                       | 1.553       |
| <i>d</i> (C-F) | 1.37                           | ---                                | 1.38                      | 1.365       |
| TV             | 2.553                          | 2.55                               | 2.61                      | ---         |
| band gap       | 3.5                            | ~ 3.0                              | ---                       | 2.96        |

[a] Calculation on graphite fluoride.

**Supplementary Figure S1** TEM image of the pristine graphite fluoride and corresponding selected area electron diffraction.

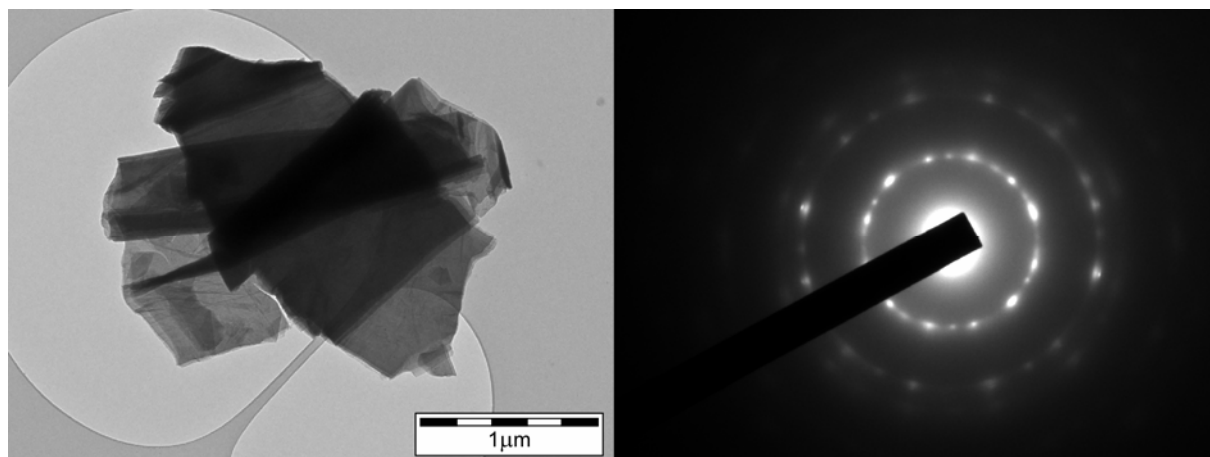

**Supplementary Figure S2** XRD (left) and SAED pattern (right) of the carbon nanostructures obtained after halide exchange process and spontaneous decomposition of graphene iodide.

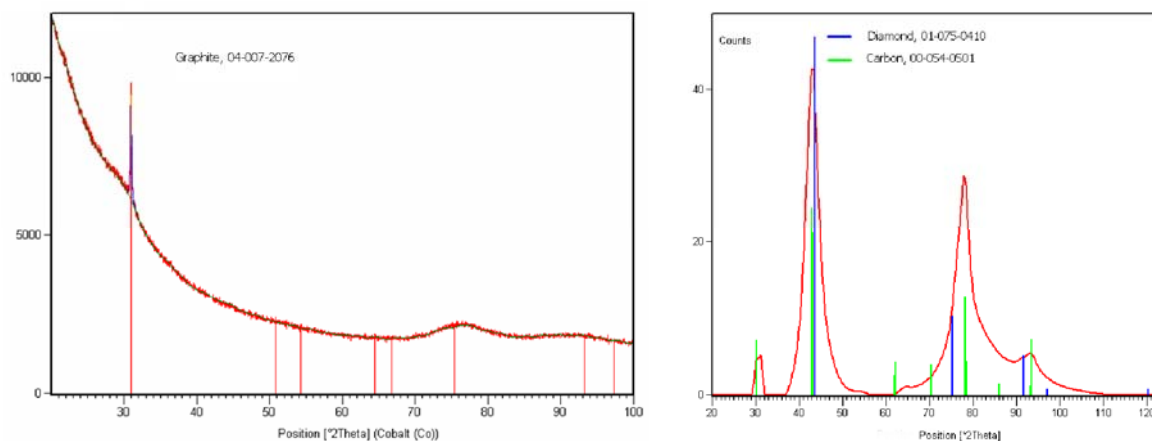

**Supplementary Figure S3** IR spectra demonstrating the considerably faster kinetics of the CF→CI→C transformations in sulfolane (left) compared to DMF (right).

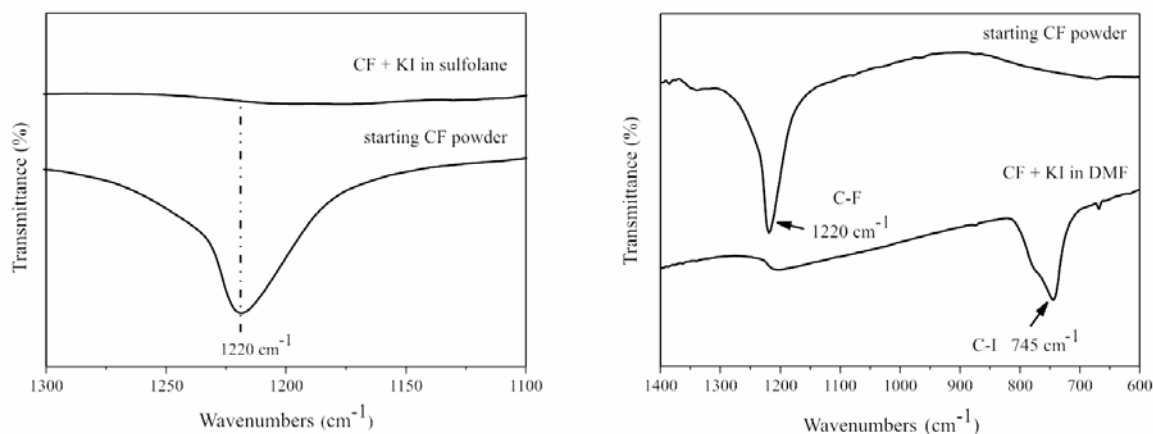

**Full reference 8:**

Frisch, M. J., Trucks, G. W., Schlegel, H. B., Scuseria, G. E., Robb, M. A., Cheeseman, J. R., Scalmani, G., Barone, V., Mennucci, B., Petersson, G. A., Nakatsuji, H., Caricato, M., Li, X., Hratchian, H. P., Izmaylov, A. F., Bloino, J., Zheng, G., Sonnenberg, J. L., Hada, M., Ehara, M., Toyota, K., Fukuda, R., Hasegawa, J., Ishida, M., Nakajima, T., Honda, Y., Kitao, O., Nakai, H., Vreven, T., Montgomery, Jr., J. A., Peralta, J. E., Ogliaro, F., Bearpark, M., Heyd, J. J., Brothers, E., Kudin, K. N., Staroverov, V. N., Kobayashi, R., Normand, J., Raghavachari, K., Rendell, A., Burant, J. C. Iyengar, S. S. Tomasi, J. Cossi, M. Rega, Millam, N. J., Klene, M. Knox, J. E., Cross, J. B., Bakken, V., Adamo, C., Jaramillo, J., Gomperts, R. E. Stratmann, O. Yazyev, A. J. Austin, R. Cammi, C. Pomelli, J. W. Ochterski, R. Martin, R. L., Morokuma, K., Zakrzewski, V. G., Voth, G. A., Salvador, P., Dannenberg, J. J., Dapprich, S., Daniels, A. D., Farkas, O., Foresman, J. B., Ortiz, J. V., Cioslowski, J., and Fox, D. J. Gaussian 09, Revision A.02, Gaussian, Inc.: Wallingford CT, 2009.
